# Supplementary material for: Managing the Sick Child in the Era of Declining Malaria Transmission: Development of ALMANACH, an Electronic Algorithm for Appropriate Use of Antimicrobials
Source: PubMed Central journal article supplement (PMC4498609; doi:10.1371/journal.pone.0127674), 2015-07-10

# **ALMANACH:**

## **A new ALgorithm for the MANAgement of CHildhood illnesses**

**For children aged 2 months up to 5 years**

**PeDiAtrick project 2009 - 2012**



## HOW TO USE ALMANACH

1. Check for GENERAL DANGER SIGNS: If any general danger sign present: give PRE-REFERRAL TREATMENT and REFER urgently to hospital P 1-2
2. If no danger sign are present: Assess the presence of fever:
  - For a child with febrile disease: Follow instructions in 'ASSESSMENT OF FEBRILE ILLNESS' chart P 3-5
  - For a child with no fever nor history of fever in the current illness: Follow instructions in 'ASSESSMENT OF NON FEBRILE ILLNESS' chart P 7-8
4. TREAT THE CHILD according to diagnoses identified in the assessment chart P 10-17

## TABLE OF CONTENTS

|                                                          |                                                                                                                                                                      |    |
|----------------------------------------------------------|----------------------------------------------------------------------------------------------------------------------------------------------------------------------|----|
| <b>Assessment and treatment for VERY SEVERE DISEASES</b> | Check for GENERAL DANGER SIGNS.....                                                                                                                                  | 1  |
|                                                          | Instructions for pre-referral treatment for VERY SEVERE DISEASE .....                                                                                                | 2  |
| <b>ASSESSMENT AND CLASSIFICATION</b>                     |                                                                                                                                                                      |    |
| Does the child have fever? .....                         |                                                                                                                                                                      | 1  |
| Assessment of FEBRILE childhood illnesses                | Does the child have COUGH or DIFFICULT BREATHING?.....                                                                                                               | 3  |
|                                                          | Does the child have DIARRHOEA?.....                                                                                                                                  | 3  |
|                                                          | Does the child have an EAR PROBLEM?.....                                                                                                                             | 4  |
|                                                          | Has the child had MEASLES now or in the past 3 months? .....                                                                                                         | 4  |
|                                                          | Does the child have INFECTED SKIN LESION? .....                                                                                                                      | 4  |
|                                                          | For children with no identified causes of fever.....                                                                                                                 | 5  |
| Assessment of NON-FEBRILE childhood illnesses:           | Does the child have cough or difficult breathing? .....                                                                                                              | 7  |
|                                                          | Does the child have DIARRHOEA? .....                                                                                                                                 | 7  |
|                                                          | Does the child have an EAR PROBLEM? .....                                                                                                                            | 8  |
|                                                          | Does the child have INFECTED SKIN LESION? .....                                                                                                                      | 8  |
| <b>MANAGEMENT AND TREATMENT</b>                          | Table of contents.....                                                                                                                                               | 10 |
| Management of COUGH related diagnoses                    | Severe pneumonia, Persistent cough or Recurrent wheezing, Pneumonia,<br>Upper respiratory tract infection, Symptomatic treatment for wheezing and cough.....         | 11 |
| Management of FEVER related diagnoses                    | Persistent fever, Malaria, Urinary tract infection, Abdominal infection<br>Symptomatic treatment for fever.....                                                      | 12 |
| Management of DIARRHOEA related diagnoses                | Severe dehydration, Severe persistent diarrhoea, Persistent diarrhoea, Dysentery,<br>Acute diarrhoea with some dehydration, Acute diarrhoea with no dehydration..... | 13 |
|                                                          | Hydration plan A, B and C.....                                                                                                                                       | 14 |
| Management of EAR related diagnoses                      | Mastoiditis, Acute febrile ear discharge, Non febrile ear discharge,<br>Chronic ear discharge, Acute ear infection, Clear the ear by dry wicking.....                | 15 |
| Management of ANAEMIA .....                              |                                                                                                                                                                      | 15 |
| Management of MEASLES related diagnoses                  | Severe measles, Measles with mouth or eye complication, Measles.....                                                                                                 | 16 |
| Management of SKIN related diagnoses                     | Severe soft tissue infection, Soft tissue infection, Impetigo or minor abscess.....                                                                                  | 16 |
| <b>ADDITIONAL INFORMATION</b>                            |                                                                                                                                                                      |    |
| Use of a spacer.....                                     |                                                                                                                                                                      | 17 |
| Weight-for-age charts.....                               |                                                                                                                                                                      | 17 |

MANAGEMENT OF **VERY SEVERE DISEASES**

**CHECK FOR GENERAL DANGER SIGNS**

Is the child:

**convulsing now?**

No

Yes

**Give:** Anticonvulsant (Diazepam)

*See instructions p.2*

AND

**having any General Danger sign?**

LOOK

- Lethargic/unconscious
- Severe pallor
- Jaundice
- Cyanosis
- Stiff neck
- Severe wasting

ASK

- Unable to drink/breastfeed
- Vomits everything
- Had convulsions (in the current illness)

Yes

**Very severe disease:**

The child needs **URGENT REFERRAL TO HOSPITAL**

**Give PRE-REFERRAL TREATMENT:**

- First dose of IM Ampicillin + Gentamicin
- IM Quinine
- Low blood sugar prevention

*See instructions p.2*

AND

**REFER URGENTLY**

Exit

No

Does the child have **some Pallor**?

No

Yes

**Anemia**

*See instructions p.15*

Does the child have **Fever ?**

- By history
- Or feels hot
- Or axillary's temperature above 37°C

Yes

No

Duration of fever?

7 days or more

Less than 7 days

**Persistent fever**

Refer for assessment

Exit

Go to page 3: Assessment of febrile acute illnesses

Go to page 7: Assessment of acute non febrile illnesses

Exit

If you reach this sign, you should refer the child without completing the assessment.  
If nothing is specified you have to complete the entire assessment before prescribing appropriate treatment.

**ANTIBIOTIC: AMPICILLINE (50 mg/kg) + GENTAMICIN (7.5 mg/kg)**

**Ampicilline** for Very severe diseases and Severe pneumonia

**Preparation** Check the vial: AMPICILLINE 500mg/0.4ml. Dilute the 500 mg vial in 2.1ml of sterile water. You have now 2.5ml of a solution with 200mg/ml.

Where there is a **strong suspicion of meningitis**, the **dose of ampicillin** can be **increased 4 times**. IF REFERRAL IS NOT POSSIBLE OR DELAYED, repeat the ampicillin injection every 6 hours.

**Gentamicin** for Very severe diseases and Severe pneumonia

**Preparation** Check the vial: GENTAMICIN 40mg/ml, 2ml. You have 80mg of Gentamicin in a 2ml solution. IF REFERRAL IS NOT POSSIBLE OR DELAYED, repeat the gentamicin injection once daily.

| AMPICILLIN 500 mg vial           |      |
|----------------------------------|------|
| 4 - <6 kg (from 2 to <4 months)  | 1 ml |
| 6 - <10 kg (4 to <12 months)     | 2 ml |
| 10 - <14 kg (12mths to <3 years) | 3 ml |
| 14 - 19 kg (3 years to <5 years) | 5 ml |

| GENTAMICIN 80mg in 2ml              |            |
|-------------------------------------|------------|
| 4 - <6 kg (2 to <4 months)          | 0.5-1.0 ml |
| 6 - <10 kg (4 to <12 months)        | 1.1-1.8 ml |
| 10 - <14 kg (12 months to <3 years) | 1.9-2.7 ml |
| 14 - 19 kg (3 years to <5 years)    | 2.8-3.5 ml |

**QUININE (10mg/kg)**

**Preparation** Check the ampoule: do you have: - QUININE 150mg/ml (300mg in 2 ml)  
or - QUININE 300mg/ml (600mg in 2 ml)

IF REFERRAL IS NOT POSSIBLE OR DELAYED, The child should remain lying down for one hour. Repeat the quinine injection 8 hourly, until the child is able to take oral antimalarial, but not more than one week.

\* quinine salt

| INTRAMUSCULAR QUININE             | 150mg*/ml | 300mg*/ml |
|-----------------------------------|-----------|-----------|
| 4 - <6 kg (2 to <4 months)        | 0.4 ml    | 0.2 ml    |
| 6 - <10 kg (4 to <12 months)      | 0.6 ml    | 0.3 ml    |
| 10 - <12 kg (12 mths to <2 years) | 0.8 ml    | 0.4 ml    |
| 12 - <14 kg (2 years to <3 years) | 1.0 ml    | 0.5 ml    |
| 14 - 19 kg (3 years to <5 years)  | 1.2 ml    | 0.6 ml    |

**PREVENT LOW BLOOD SUGAR**

If the child is able to breastfeed: Ask the mother to breastfeed the child.

If the child is not able to breastfeed but is able to swallow: Give expressed breast milk or a breast-milk substitute.

If neither of these is available, give sugar water\*. Give 30 - 50 ml of milk or sugar water\* before departure.

If the child is not able to swallow: Give 50 ml of milk or sugar water\* by nasogastric tube.

\* To make sugar water: Dissolve 4 level teaspoons of sugar (20 grams) in a 200-ml cup of clean water.

**ANTICONVULSANT: DIAZEPAM (0.5 mg/kg)**

**Instructions** Turn the child to his/her side and clear the airway. Avoid putting things in the mouth. Give diazepam solution per rectum using a small syringe without a needle (like a tuberculin syringe) or using a catheter. Check for low blood sugar, then treat or prevent. Give oxygen and REFER. If convulsions have not stopped after 10 minutes repeat diazepam dose once.

| DIAZEPAM                            | 10mg/2mls |
|-------------------------------------|-----------|
| <5 kg (<6 months)                   | 0.5 ml    |
| 5 - <10 kg (6 to <12 months)        | 1 ml      |
| 10 - <14 kg (12 months to <3 years) | 1.5 ml    |
| 14 - 19 kg (3 years to <5 years)    | 2 ml      |

**ASSESSMENT OF FEBRILE CHILDHOOD ILLNESSES**

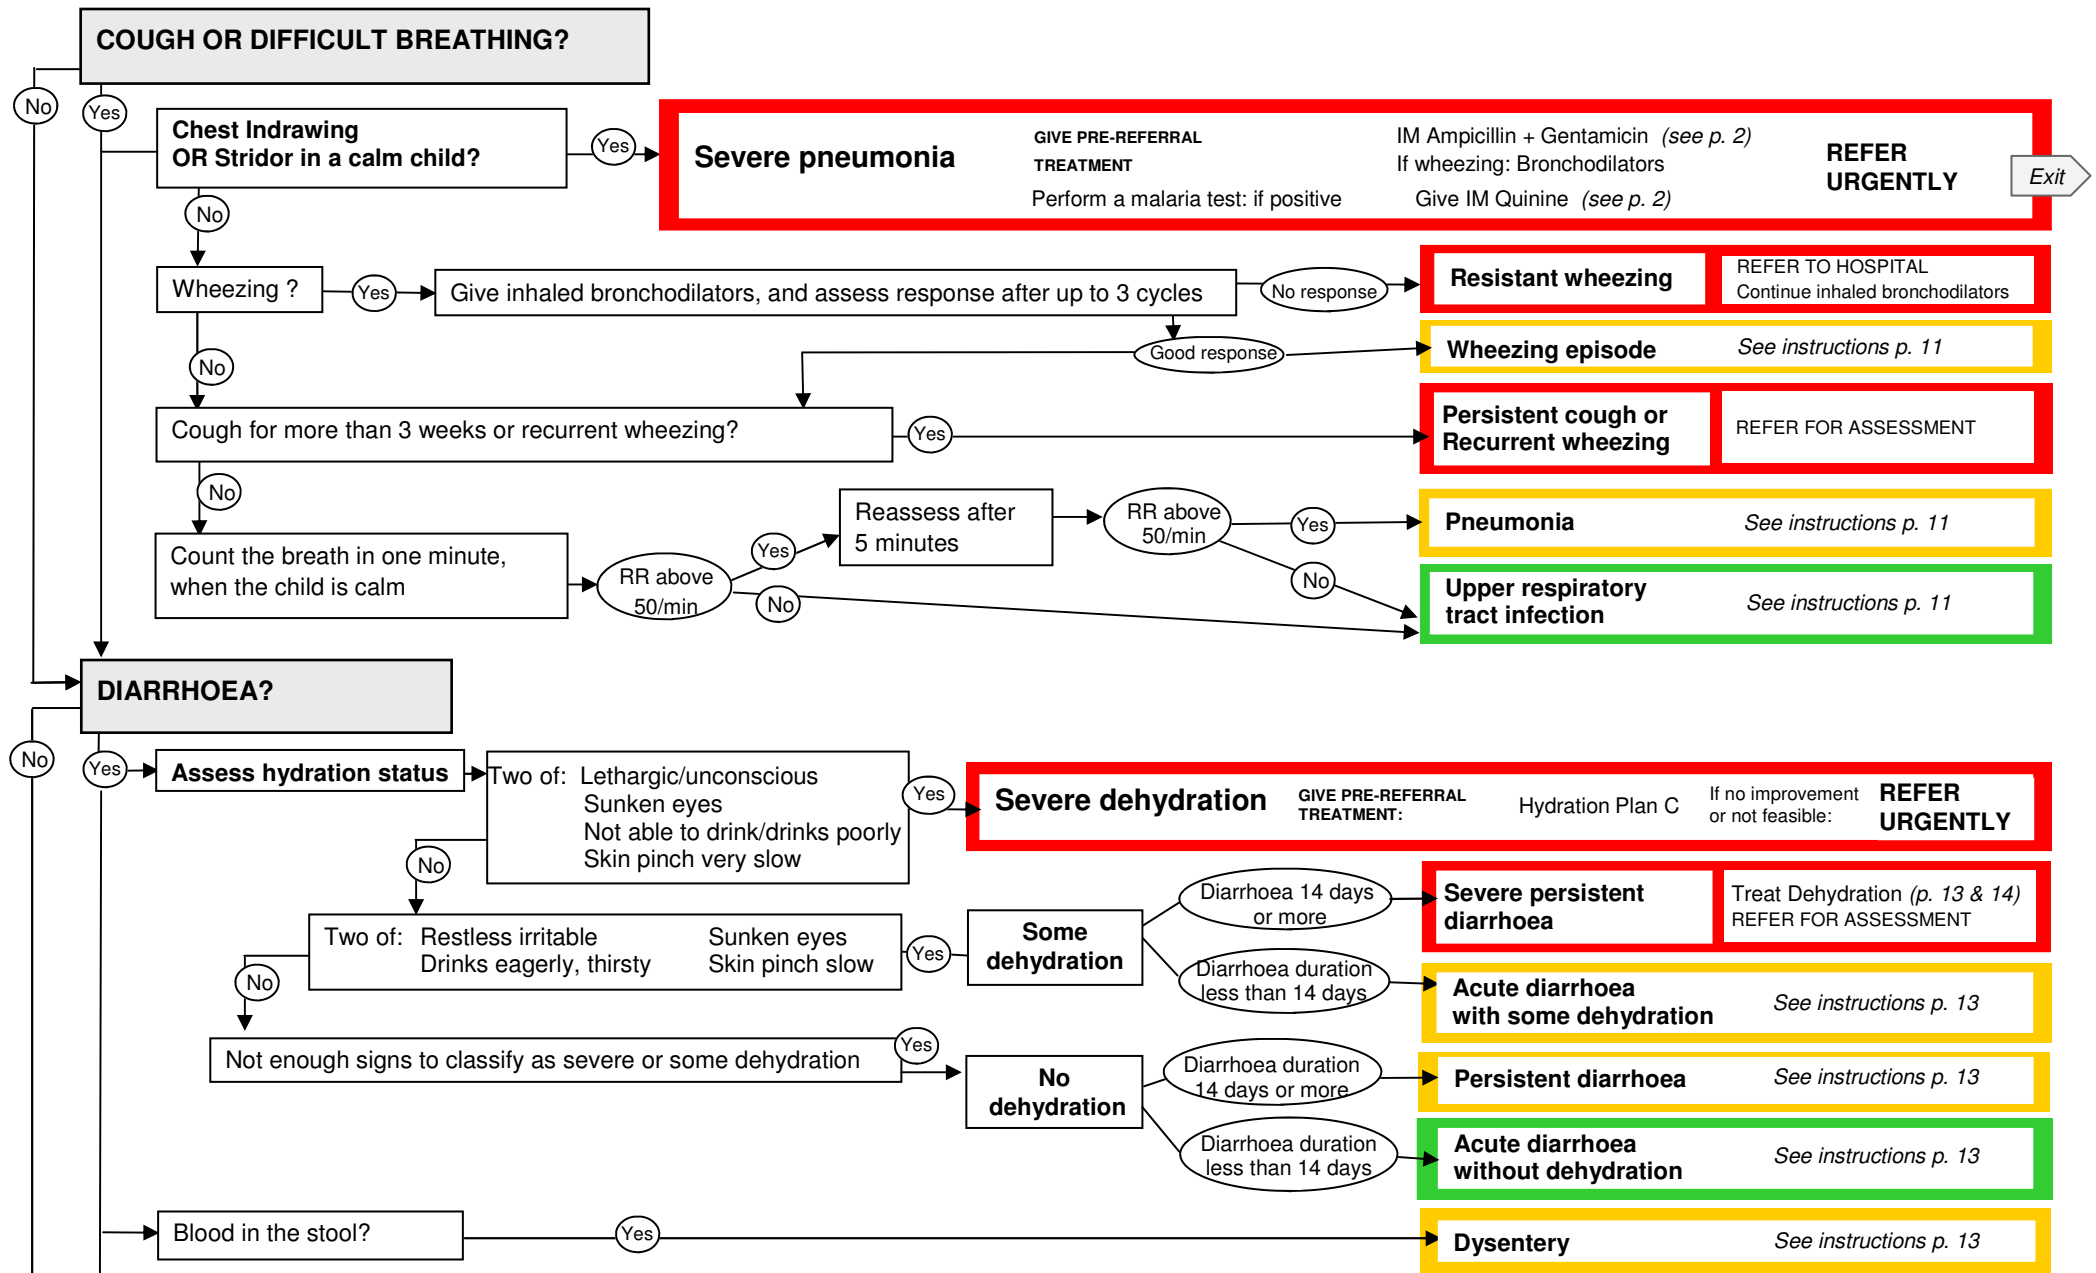

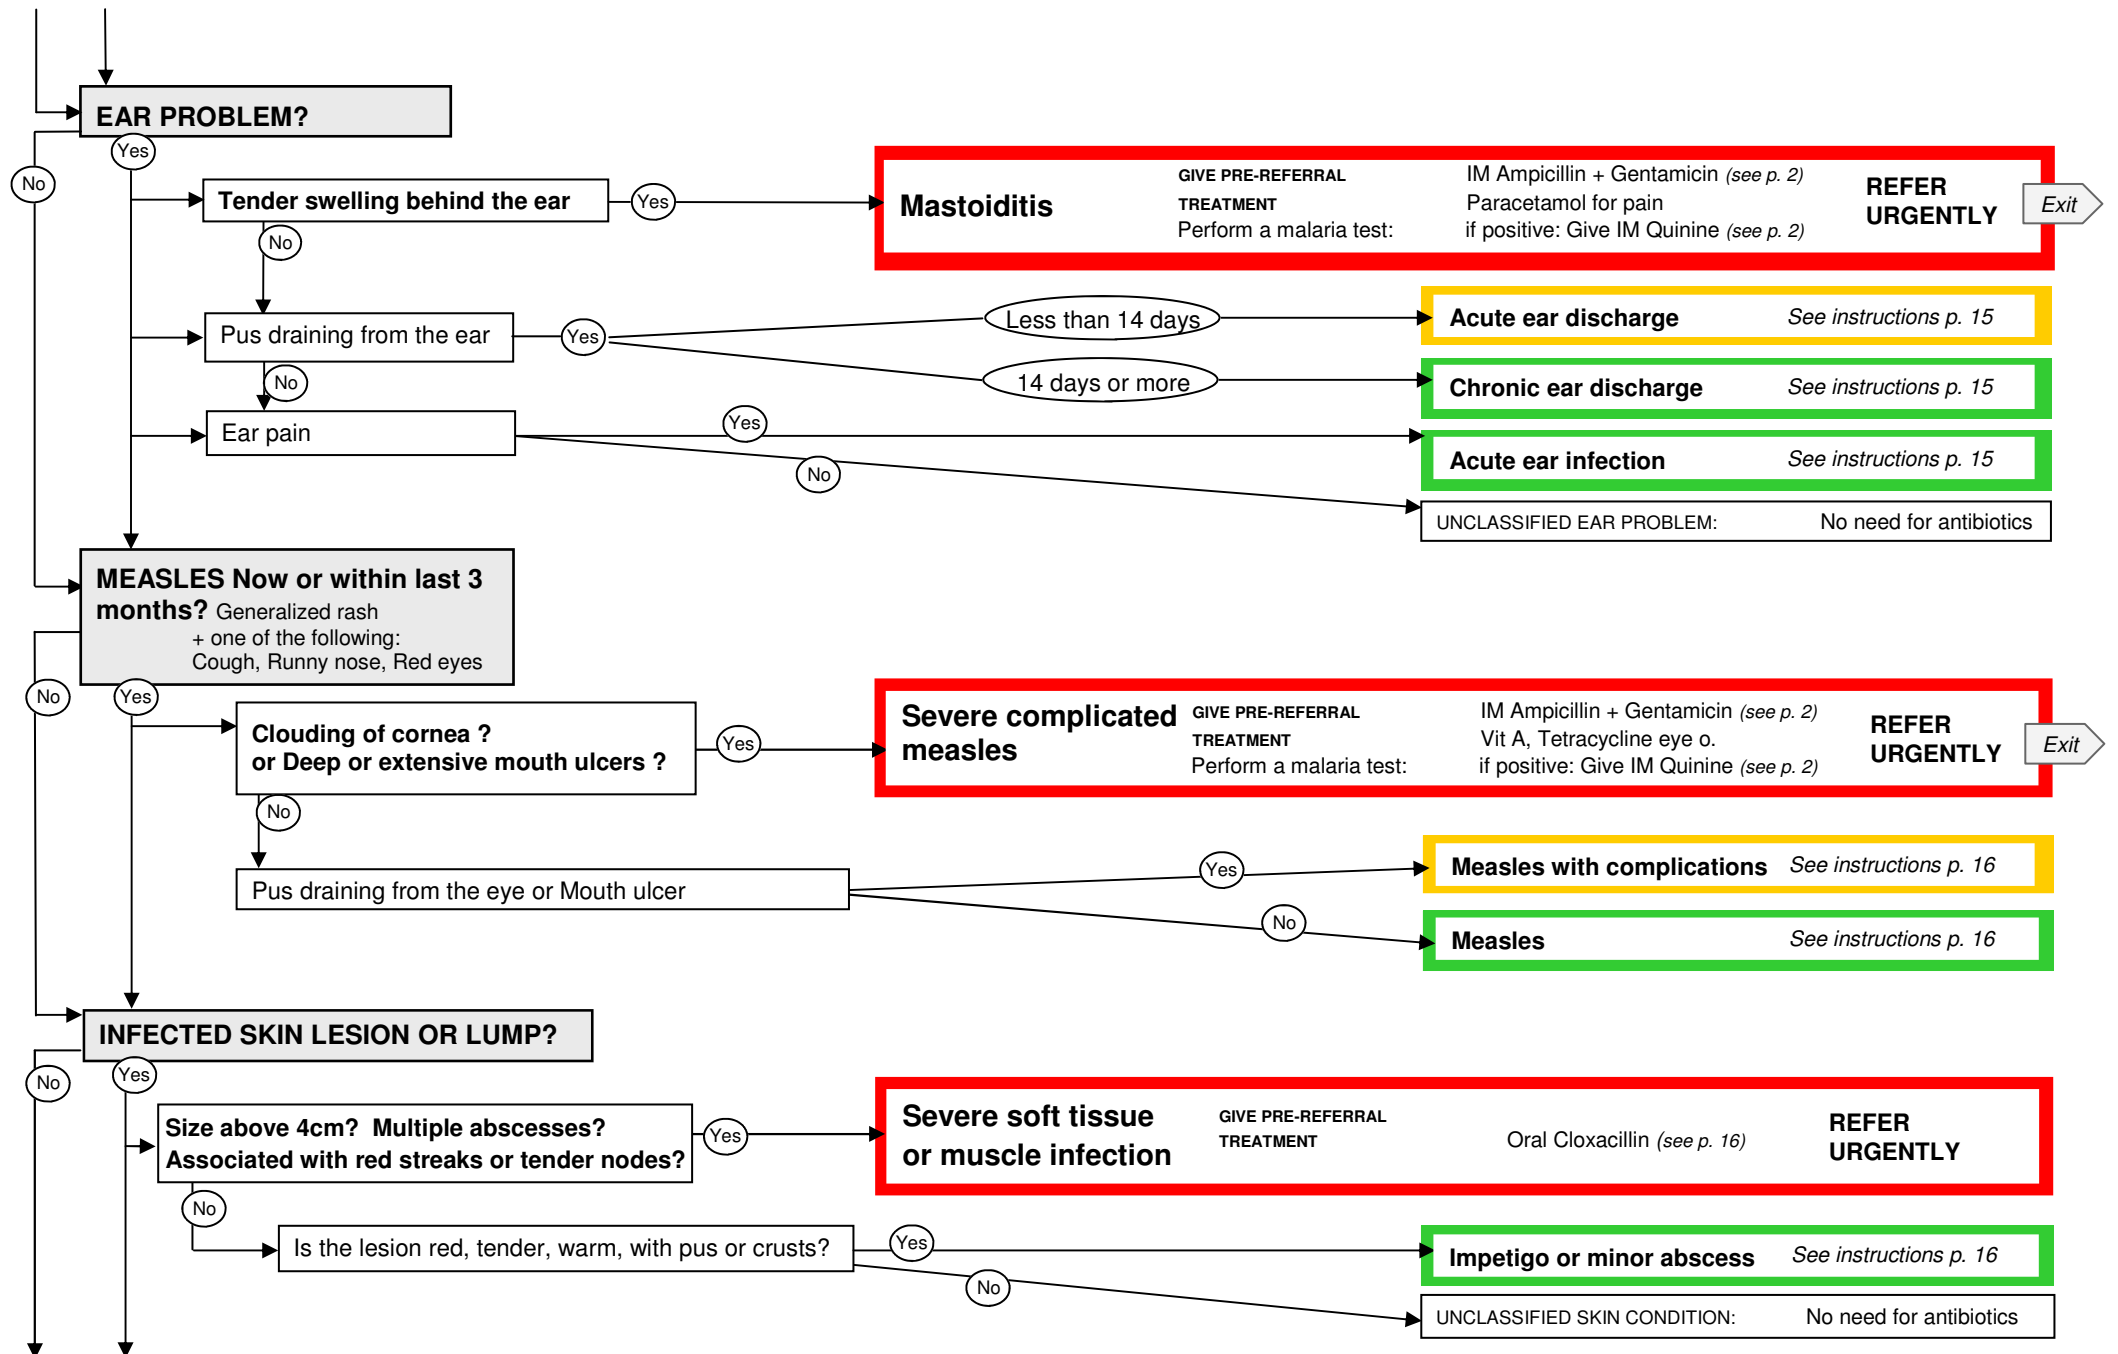

Complete assessment of febrile illnesses p. 5

## ASSESSMENT OF FEBRILE CHILDHOOD ILLNESSES

After this assessment if the child has fever with no identified cause, perform the following:

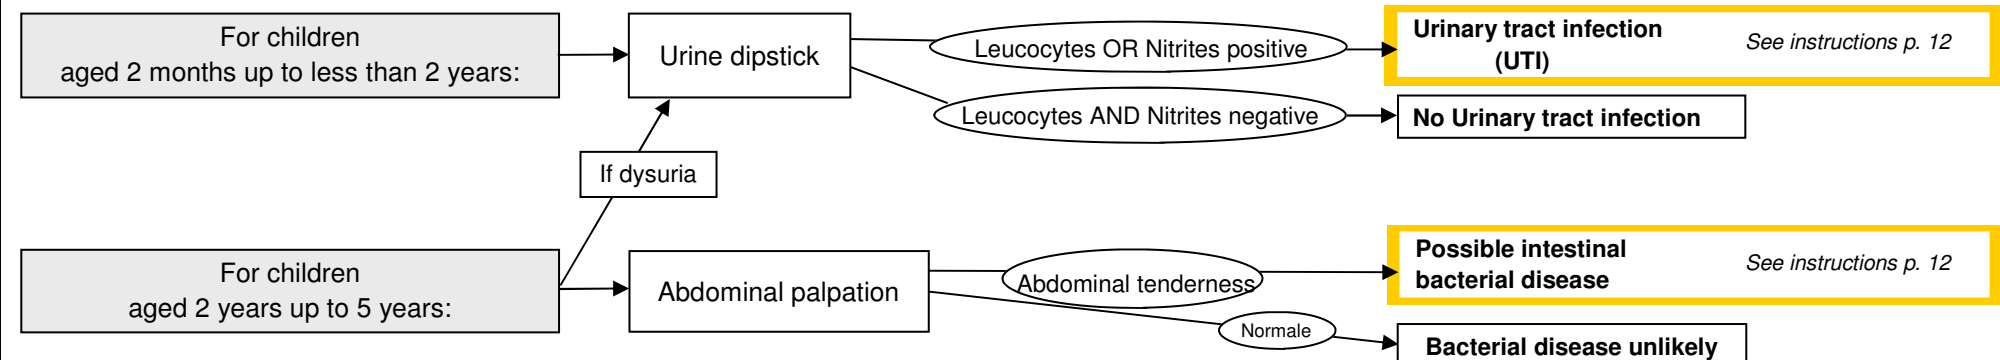

**FOR ALL CHILDREN WITH FEVER OR HISTORY OF FEVER: CONSIDER MALARIA**

**CONSIDER MALARIA: Perform a malaria RAPID DIAGNOSIS TEST (mRDT)**

If mRDTs are not available, perform a blood-slide.

Positive

Negative

**Malaria**

No Malaria

*See instructions p. 12*

**If you answered NO to all the questions**, the child has fever with no obvious cause, no danger sign, and the malaria test is negative. The child is likely to have a **Viral infection**. S/he does NOT need neither antibiotic nor antimalarial. Prescribe symptomatic treatment for fever (*see page 12*). Reassure the caretaker and advise him/her to return immediately if the child is not able to drink or becomes sicker. Advise him/her to come back after 2 days if fever persists.

YOU HAVE REACHED THE END OF THE ALMANACH ASSESSMENT FOR FEBRILE ILLNESSES

After completing this thorough assessment you may have one or several diagnoses for a child. You will find the recommendations for treatment and additional measures for the management of childhood illnesses in pages 10 to 18.





**ASSESSMENT OF NON FEBRILE CHILDHOOD ILLNESSES**

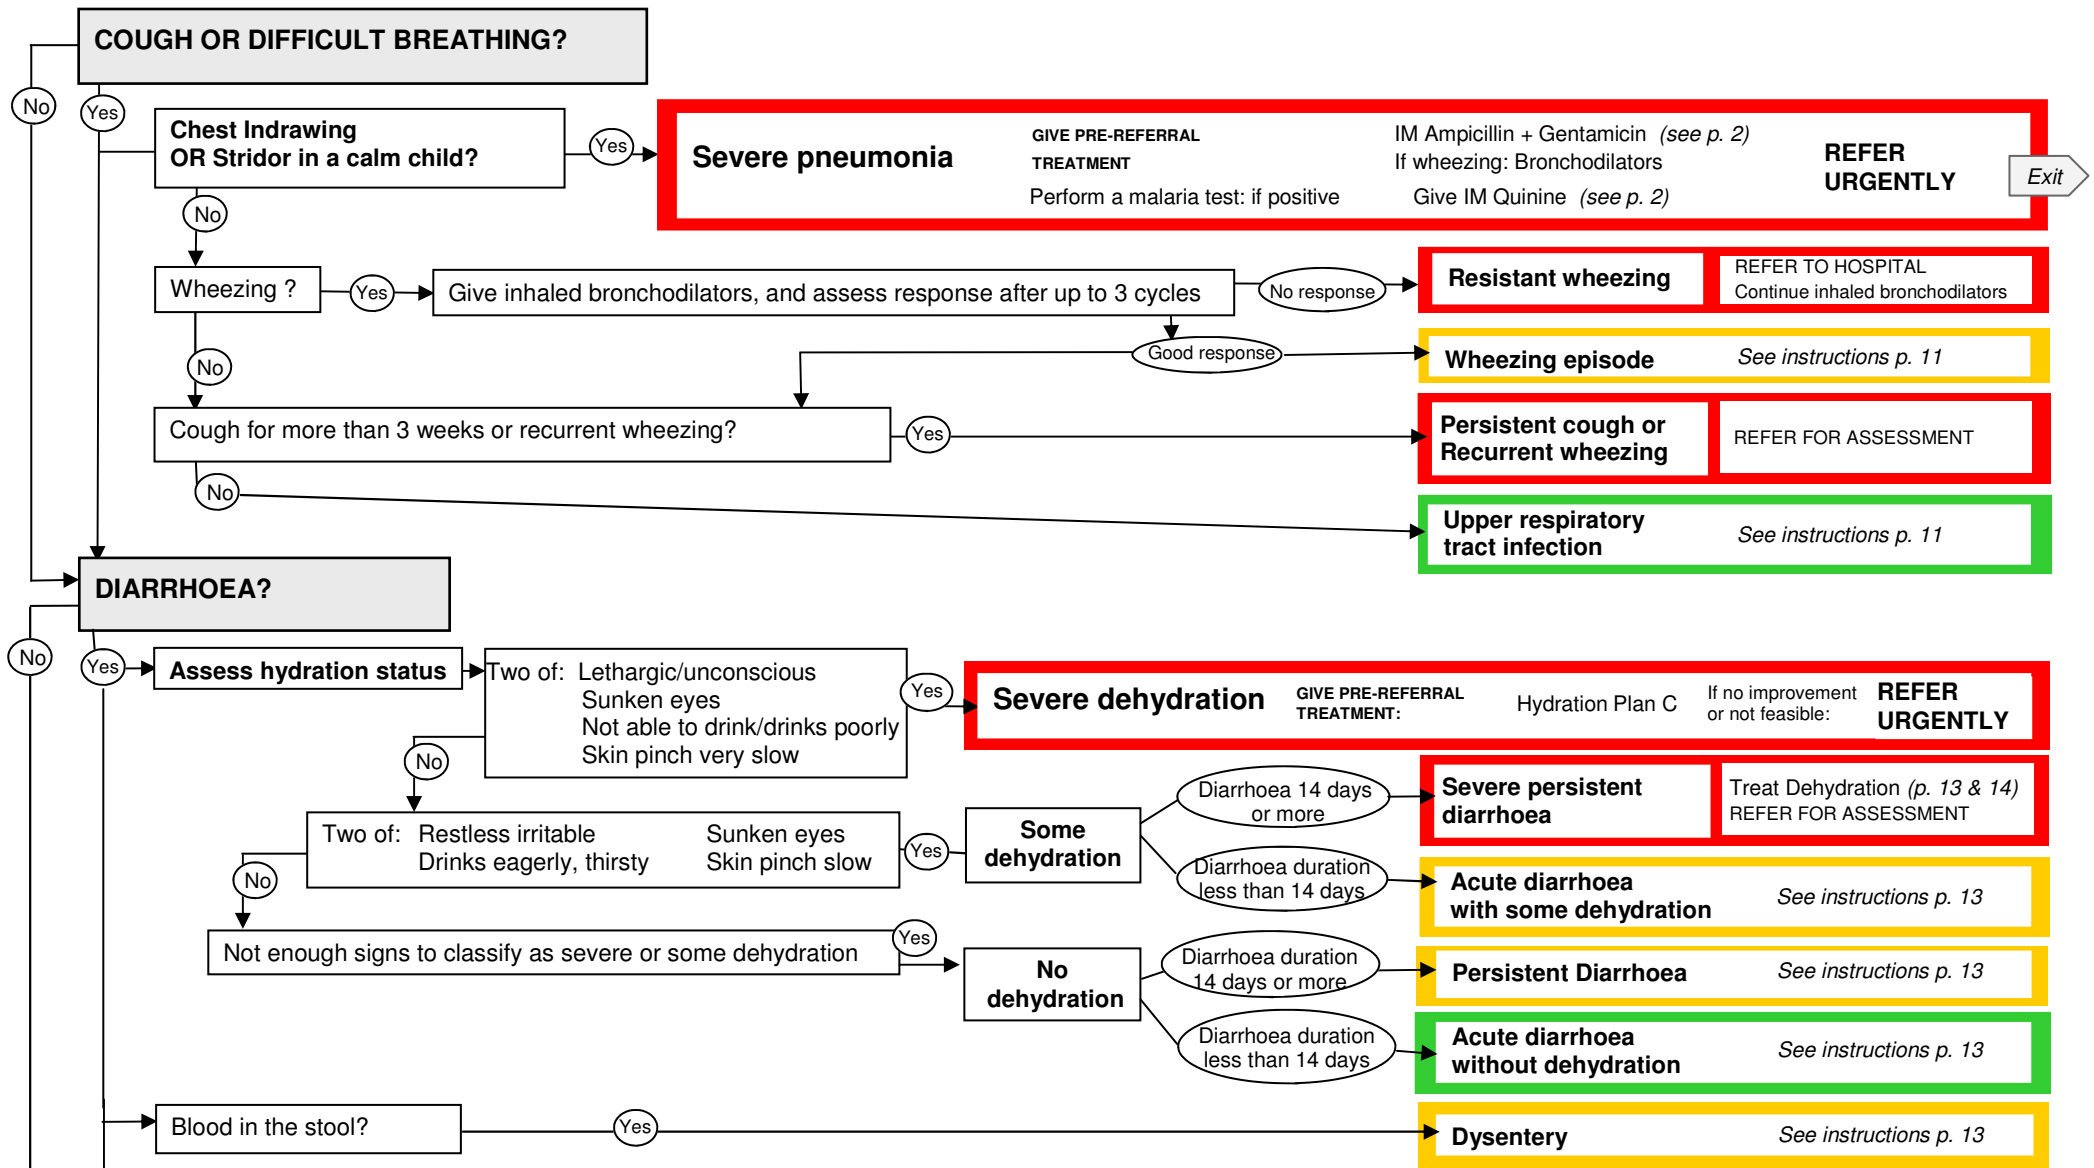

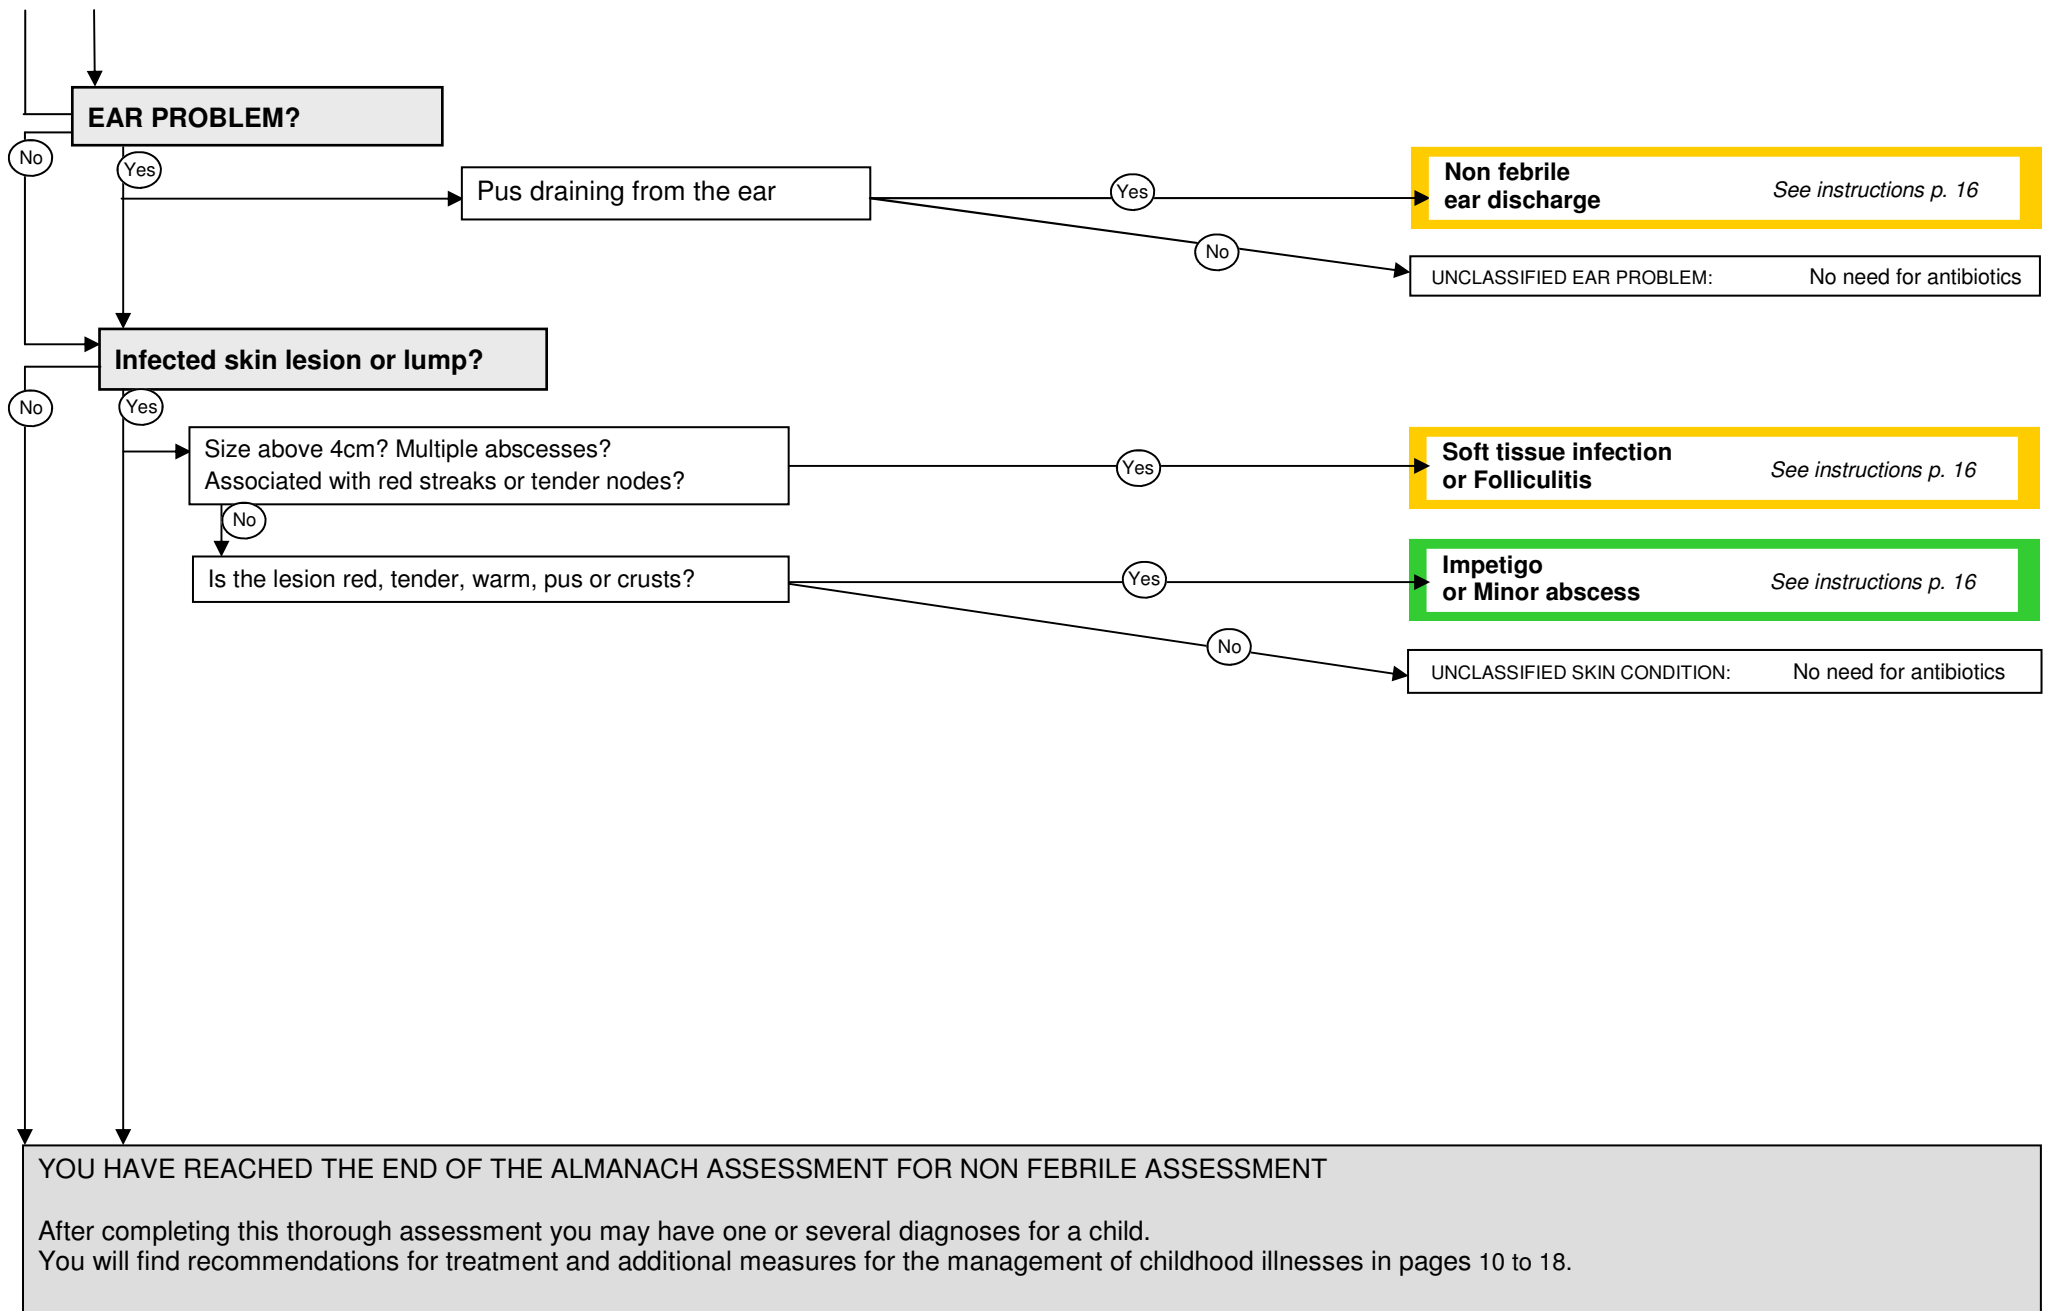



# MANAGEMENT AND TREATMENT CHART

## TABLE OF CONTENTS

|                                                                                                   |    |
|---------------------------------------------------------------------------------------------------|----|
| General recommendations .....                                                                     | 10 |
| Management of <b>COUGH</b> related diagnoses                                                      |    |
| Severe pneumonia, Persistent cough or Recurrent wheezing, Pneumonia,.....                         | 11 |
| Upper respiratory tract infection.....                                                            | 11 |
| Symptomatic treatment for Wheezing and Cough.....                                                 | 11 |
| Management of <b>FEVER</b> related diagnoses                                                      |    |
| Persistent fever, Malaria, Urinary tract infection, Abdominal infection.....                      | 12 |
| Symptomatic treatment for fever.....                                                              | 12 |
| Management of <b>DIARRHOEA</b> related diagnoses                                                  |    |
| Severe dehydration, Severe persistent diarrhoea, Persistent diarrhoea, Dysentery, .....           | 13 |
| Acute diarrhoea with some dehydration, Acute diarrhoea with no dehydration.....                   | 13 |
| Hydration plan A, B and C.....                                                                    | 14 |
| Management of <b>EAR</b> related diagnoses                                                        |    |
| Mastoiditis, Acute febrile ear discharge, Non febrile ear discharge, Chronic ear discharge, ..... | 15 |
| Acute ear infection.....                                                                          | 15 |
| Clear the ear by dry wicking.....                                                                 | 15 |
| Management of <b>ANAEMIA</b> related diagnoses .....                                              | 15 |
| Management of <b>MEASLES</b> related diagnoses                                                    |    |
| Severe Measles, Measles with mouth or eye complication, Measles.....                              | 16 |
| Management of <b>SKIN</b> related diagnoses                                                       |    |
| Severe soft tissue infection, Soft tissue infection, Impetigo or minor abscess.....               | 16 |
| COMPLEMENTARY DOCUMENT                                                                            |    |
| Use of a spacer.....                                                                              | 17 |
| Weight-for-age charts.....                                                                        | 17 |

## GENERAL RECOMMENDATIONS

Always tell the caretakers the reason for giving the drug, and teach them how to give it at home if needed.  
 Demonstrate how to prepare a dose, watch them preparing the first dose, explain carefully how to give the drug and to complete the treatment even if the child gets better. Check the caretakers' understanding before they leave.

## REASSURING THE CARETAKER when the RDT is negative

Reassure the caretaker that:

- the child does NOT have malaria
- the diagnostic test (RDT) is very accurate
- antimalarials will NOT help the child and you do not want to unnecessarily expose the child to side effects that may accompany these medications

MANAGEMENT AND TREATMENT CHART FOR **COUGH** RELATED DIAGNOSES

**Severe pneumonia or Very severe disease** Give IM Ampicillin and Gentamicin (*see page 2 for instructions*)  
Give inhaled bronchodilators if wheezing (*see below*) REFER URGENTLY

**Resistant wheezing** Continue inhaled bronchodilators, using a spacer, on the way to hospital (*see below*) REFER URGENTLY

**Persistent cough or recurrent wheezing** Refer to hospital for further assessment for Tuberculosis or Asthma

**Pneumonia** Give Amoxicillin 25mg/kg, 2 times daily, for 5 days  
Discuss HIV infection

Advise caretaker to:

Come back immediately if the child is not able to drink or breastfeed, or becomes sicker  
Come back after 2 days if fever or difficult breathing persist

| Amoxicillin<br>25mg/kg            | CAPSULES<br>250 mg | SYRUP<br>125 mg/5 ml |
|-----------------------------------|--------------------|----------------------|
| 4 - <6 kg (2 months to <4 months) |                    | 5 ml                 |
| 6 - <14 kg (4 months to <3 years) | 1                  | 10 ml                |
| 14 - 19 kg (3 years to <5 years)  | 2                  | 15 ml                |

**Wheezing episode**

Treat the wheezing in the clinic following the symptomatic treatment instructions below. If the child has a good response to the treatment, and doesn't need referral, continue the treatment at home:

*At home:* continue treatment with inhaled salbutamol, 3 to 4 times a day, for 5 days.

*If inhaler not available:* Use oral salbutamol (2 months up to 12 months: 1mg, 3 times daily; 2 months up to 4 years: 2mg, 3 to 4 times daily)

Advise caretaker to:

Come back immediately if the child is not able to drink/breastfeed, becomes sicker, or develops fever  
Come back if the wheezing/difficult breathing persists after treatment

**Upper respiratory tract infection (URTI)** Explain the mother that the URTI is a viral disease that is self limiting

Advise caretaker to:

Relieve cough and soothe the throat with breast milk for an infant breastfed, or with tea with lemon or tea with honey for an older child  
Come back immediately if the child is not able to drink or breastfeed, becomes sicker, develops fever, or develops fast/difficult breathing or wheeze  
Come back after 5 days if the symptoms persist

## ADDITIONAL SYMPTOMATIC TREATMENTS

**Wheezing:** *In the clinic:* Give inhaled bronchodilators: Salbutamol, using a spacer (*See page 17*): From salbutamol metered dose inhaler (100 µg/puff) give 2 puffs.  
Reassess the child after 15 minutes. Repeat up to 3 times every 15 minutes before classifying pneumonia.

**Cough and/or sore throat:** To relieve cough and soothe the throat recommend the caretaker to use the safe remedies below:  
For an infant who is exclusively breastfed: breast milk For other children: breast milk, tea with honey, tea with lemon.

MANAGEMENT AND TREATMENT CHART FOR **FEVER** RELATED DIAGNOSES

**Persistent fever**

Refer to hospital for further assessment

**Malaria** Give ALu: - Give first dose in the clinic and observe the child for one hour. If the child vomits within an hour repeat the dose.  
 - Tell the mother to give second dose after 8 hours and then 2 times daily for further 2 days as shown in the table.  
 - ALu should be given with food.

Give one dose of paracetamol in the clinic for high fever (38.5 and above).

Advise caretaker to:  
 Come back immediately if the child is not able to drink or breastfeed, or becomes sicker  
 Come back after 2 days if fever persists  
 Always use insecticide treated mosquito net

| ALu (artemether + lumefantrine)      | Tablet<br>(artemether 20mg + lumefantrine 120mg) |    |     |     |     |     |
|--------------------------------------|--------------------------------------------------|----|-----|-----|-----|-----|
|                                      | 0h                                               | 8h | 24h | 36h | 48h | 60h |
| 5* <15 kg<br>(2 months to <3 years)  | 1                                                | 1  | 1   | 1   | 1   | 1   |
| 15 - <25 kg<br>(3 years to <5 years) | 2                                                | 2  | 2   | 2   | 2   | 2   |

*\*Children weighing less than 5 kg should be treated with Quinine Give Quinine tabs 300mg: 1/4, 3 times daily, for 7 days.*

**Urinary tract infection (UTI)** Give Ciprofloxacin 15mg/kg, 2 times a day, for 5 days

Advise caretaker to: Increase fluids  
 Come back immediately if the child is not able to drink/breastfeed, or becomes sicker  
 Come back after 2 days if fever persists

| Ciprofloxacin 15mg/kg               | Tablet 250 mg | Tablet 500mg |
|-------------------------------------|---------------|--------------|
| <6 kg<br>(less than 6 months)       | 1/4           |              |
| 6- <14 kg<br>(6 months to <3 years) | 1/2           | 1/4          |
| 14-19 kg<br>(3 years to <5 years)   | 1             | 1/2          |

**Possible intestinal bacterial disease** Give Ciprofloxacin 15mg/kg, 2 times a day, for 5 days

Advise caretaker to: Increase fluids  
 Come back immediately if the child is not able to drink/breastfeed, or becomes sicker  
 Come back after 2 days if fever persists

SYMPTOMATIC MANAGEMENT AND TREATMENT FOR **FEVER**

**For all children with FEVER:** Give first dose of paracetamol in the clinic if high fever (38.5°C and above)

Explain caretaker to: Expose the child (decrease or remove the clothes)  
 Increase the fluids intake  
 Give paracetamol, 15mg/kg, every 6 hours until high fever or pain is gone

| Paracetamol 15mg/kg            | Syrup 120mg/5ml | Tablet 500mg |
|--------------------------------|-----------------|--------------|
| <4kgs                          | 2ml             | -            |
| 4-<10 kg (2 months to <1 year) | 5ml             | 1/4          |
| 10-19 kg (1 year to <5 years)  | -               | 1/2          |

MANAGEMENT AND TREATMENT CHART FOR **DIARRHOEA** RELATED DIAGNOSES**Severe dehydration**Give Hydration plan C (*see page 14*)

REFER URGENTLY to hospital if Plan C is not available in your health facility or if the child does not improve after 3 hours of treatment

**Severe persistent diarrhoea**Give hydration plan B (*see page 14*)

and refer to hospital for further assessment

**Acute diarrhoea with some dehydration**Give hydration plan B (*see page 14*)

Give zinc\*

Advise caretaker to:

Continue feeding and give zinc\*

Come back immediately if the child is not able to drink/breastfeed, becomes sicker, develops fever, or blood in stool

Come back after 5 days if diarrhoea persists

**Persistent Diarrhoea**Give zinc\* , Vitamin A treatment (*see page 16*), and multivitamin  
Discuss HIV infection

Advise caretaker on feeding:

Continue breastfeeding, and give more frequent, longer breastfeeds, day and night

If the child takes other milk:

Replace with increased breastfeeding OR Replace with fermented milk products, such as yoghurt

OR Replace half the milk with nutrient—rich semisolid food

Advise caretaker to come back:

Immediately if the child is not able to drink/breastfeed, becomes sicker, develops fever, or blood in stool

After 5 days if diarrhoea persists

**Dysentery**

Give Ciprofloxacin 15mg/kg, 2 times a day, for 3 days

Give hydration according to dehydration status and continue feeding

Advise caretaker to come back:

Immediately if the child is not able to drink/breastfeed, becomes sicker, or develops fever

After 2 days if the diarrhoea persists

| <b>Ciprofloxacin</b> 15mg/kg        | Tablet<br>250 mg | Tablet<br>500mg |
|-------------------------------------|------------------|-----------------|
| <6 kg<br>(less than 6 months)       | 1/4              |                 |
| 6- <14 kg<br>(6 months to <3 years) | 1/2              | 1/4             |
| 14-19 kg<br>(3 years to <5 years)   | 1                | 1/2             |

**Acute diarrhoea without dehydration**Give hydration plan A (*see page 14*)

Give zinc\*

Advise caretaker to:

Continue feeding and give zinc\*

Come back immediately if the child is not able to drink/breastfeed, becomes sicker, develops fever, or blood in stool

Come back after 5 days if diarrhoea persists

**\*Give Zinc for 14 days to all children with diarrhoea:**

From 2 months up to 6 months: 1/2 tablet daily

6 months or more: 1 tablet daily

Show caretaker how to give zinc supplements:

Infants: dissolve tablet in a small amount of expressed breast milk, ORS or clean water in a cup.

Older children: tablets can be chewed or dissolved in a small amount of water.



### HYDRATION PLAN A

Give extra fluids (as much as the child will take): Give more frequent, longer breastfeeds, and give ORS or clean water in addition to breast milk. If the child is not exclusively breastfed, also give food-based fluids (such as soup, rice water, and yoghurt drinks).

Give ORS at home especially when the child has been treated with Plan B or Plan C during this visit OR when the child cannot return to a clinic if the diarrhoea gets worse.

Teach the caretaker how to mix and give ORS: Give 2 packets of ORS. Show how much fluid to give in addition to the usual fluid intake. Tell her/him to give after each loose stool: 50 to 100ml for a child below 2 years of age, and 100 to 200ml for a child older than 2 years. Give frequent sips from a cup. If the child vomits, wait 10 minutes. Then continue but more slowly. Continue giving extra fluid until the diarrhoea stops.

### HYDRATION PLAN B Give ORS at the clinic over a 4 hours period.

Determine recommended amount of ORS to give over a 4 hours period using the table aside. If the child wants more ORS than shown, give more.

|           |           |                        |                       |                     |
|-----------|-----------|------------------------|-----------------------|---------------------|
| WEIGHT    | < 6 kg    | 6 - <10 kg             | 10 - <12 kg           | 12 - 19 kg          |
| AGE       | <4 months | 4 months to <12 months | 12 months to <2 years | 2 years to <5 years |
| ORS in ml | 200 - 450 | 450 - 800              | 800 - 960             | 960 - 1600          |

*Use the child's age only when you do not know the weight.*

Show caretaker how to give ORS solution: Give frequent small sips from a cup. If the child vomits, wait 10 minutes. Then continue, but more slowly.

Continue breastfeeding whenever the child wants.

After 4 hours: Reassess the child and classify the child for dehydration. Select the appropriate plan to continue treatment. Begin feeding the child in clinic.

Before the caretaker leaves the clinic give her/him all explanation on how to continue the treatment at home (*see plan A*).

### HYDRATION PLAN C: TREAT SEVERE DEHYDRATION QUICKLY: Follow the arrows. If answer is 'YES' go across. If 'NO' go down.

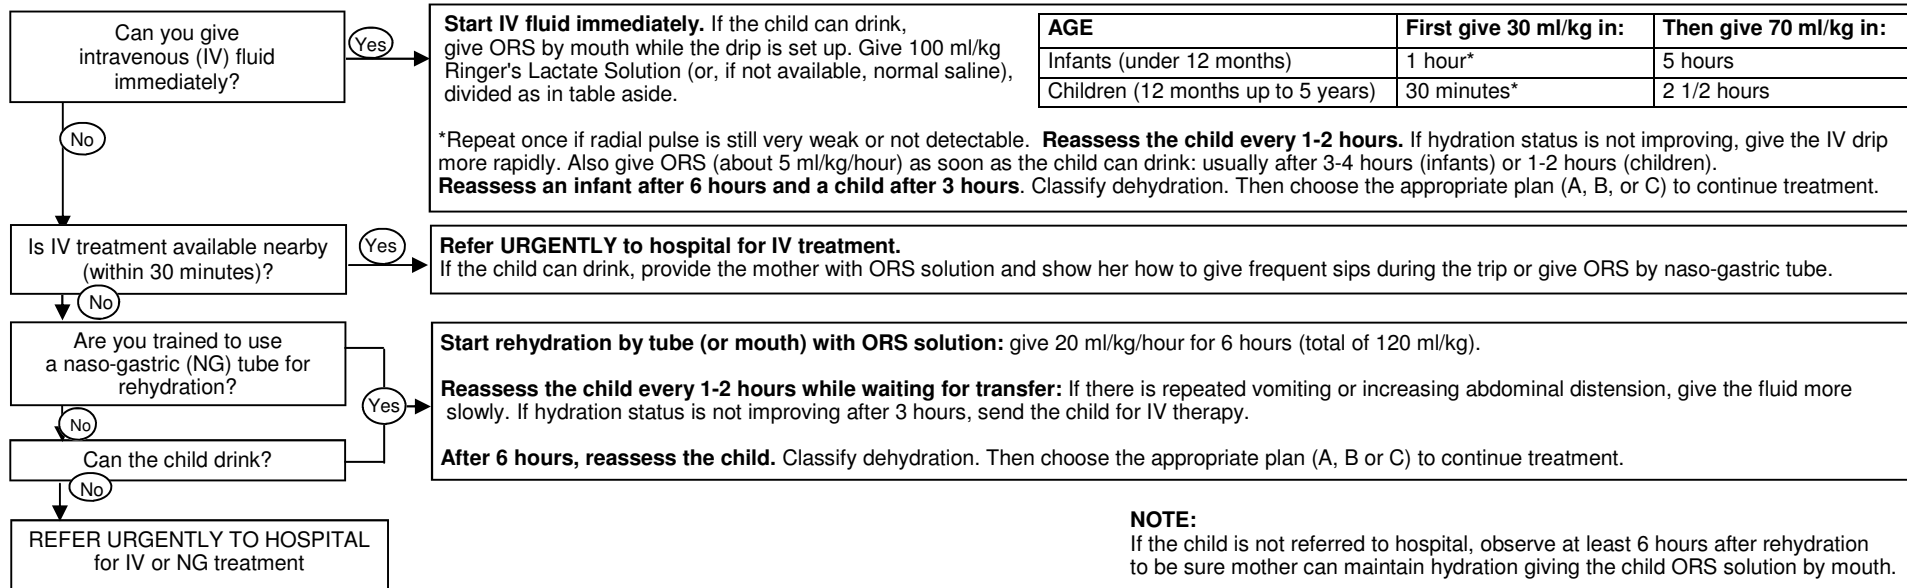

MANAGEMENT AND TREATMENT CHART FOR **EAR** RELATED DIAGNOSES**Mastoiditis**

Give IM Ampicillin and Gentamicin (*see page 2 for instructions*)  
Give paracetamol for pain (*see p10*)

REFER URGENTLY

**Acute febrile ear discharge**

Give Amoxicillin 25mg/kg, 2 times daily, for 5 days  
Dry the ear by wicking\*  
Discuss HIV infection

Advise caretaker to come back: immediately if the child is not able to drink or breastfeed, or becomes sicker after 5 days if ear discharge persists

| Amoxicillin<br>25mg/kg            | CAPSULES<br>250 mg | SYRUP<br>125 mg/5 ml |
|-----------------------------------|--------------------|----------------------|
| 4 - <6 kg (2 months to <4 months) |                    | 5 ml                 |
| 6 - <14 kg (4 months to <3 years) | 1                  | 10 ml                |
| 14 - 19 kg (3 years to <5 years)  | 2                  | 15 ml                |

**Chronic ear discharge OR Non febrile ear discharge**

Dry the ear by wicking\* and instil quinolones eardrops just after wicking, 3 times daily, for 2 weeks.  
(*Quinolones eardrops may contain ciprofloxacin, norfloxacin or ofloxacin*)  
Discuss HIV infection

Advise caretaker to come back: immediately if the child is not able to drink or breastfeed, becomes sicker, or develops fever after 5 days if ear discharge persists

**Acute ear infection**

Give paracetamol for pain (*see page 10*)

Advise caretaker to come back: immediately if the child is not able to drink or breastfeed, or becomes sicker after 3 days if pain or fever persist

**\*Dry wicking to clear the ear of children with ear discharge**

Dry the ear at least 3 times daily:  
Wash hands.  
Roll a clean absorbent cloth or soft, strong tissue paper into a wick.  
Place the wick in the child's ear. Remove the wick when wet.  
Replace the wick with a clean one and repeat this steps until the ear is dry.

MANAGEMENT AND TREATMENT CHART FOR **ANAEMIA****Anaemia**

Give Iron\*, 1 dose daily, for a total of 2 months  
Give Mebendazole 500mg single dose, if the child is one year or older and has not had a dose in the previous 6 months.

Check Malaria: Perform a Rapid diagnostic test (RDT) and treat if positive (*see page 11*)

Advise caretaker to come back: immediately if the child is not able to drink, becomes sicker, or develops fast breathing or fever after 14 days for re-assessment

| IRON                         | Ferrous sulfate 200 mg + 250 µg<br>Folate (60 mg elemental iron) | Ferrous fumarate 100 mg per 5 ml<br>(20 mg elemental iron per ml) |
|------------------------------|------------------------------------------------------------------|-------------------------------------------------------------------|
| 4 - <6 kg (2 to <4 months)   |                                                                  | 1.00 ml (< 1/4 tsp.)                                              |
| 6 - <10 kg (4 to <12 months) |                                                                  | 1.25 ml (1/4 tsp.)                                                |
| 10 - <14 kg (1 to <3 years)  | 1/2 tablet                                                       | 2.00 ml (<1/2 tsp.)                                               |
| 14 - 19 kg (3 to <5 years)   | 1/2 tablet                                                       | 2.5 ml (1/2 tsp.)                                                 |

MANAGEMENT AND TREATMENT CHART FOR **MEASLES** RELATED DIAGNOSES

**Severe complicated measles**

Give IM Ampicillin and Gentamicin (*see page 2 for instructions*)  
 Give Vitamin A and Tetracycline eye ointment (*see below*)

REFER URGENTLY

**Measles with eye or mouth complication**

Give vitamin A treatment (*See below*) to children from 6 months up to 5 years, except if the child has had a dose in the past month.  
 Give paracetamol for pain relief.

**Treat eye infection with tetracycline eye ointment** in both eyes, 4 times daily\*: Clean both eyes: Wash hands, use clean cloth and water to gently wipe the pus. Then apply tetracycline eye ointment: Squirt a small amount of ointment on the inside of the lower lid. Wash hands again. Treat until there is no pus discharge. Do not put anything else in the eyes.

**Treat for mouth ulcers with Gentian Violet (GV)** twice daily\*: Wash hands. Wash the child's mouth with clean soft cloth wrapped around the finger and wet with salt water. Paint the mouth with half-strength gentian violet (0.25% dilution). Wash hands again. Continue using gentian violet for 48 hours after the ulcers have been cured.

Advise caretaker to come back: Immediately if the child is not able to drink/breastfeed, becomes sicker, develops fever  
 After 2 days if symptoms persist

**Measles**

Give Vitamin A treatment: Give a dose of Vitamin A to children from 6 months up to 5 years, except if the child has had a dose in the past month.

| AGE                   | 6 to <12 months | One year and older |
|-----------------------|-----------------|--------------------|
| <b>Vitamin A dose</b> | 100 000 IU      | 200 000 IU         |

MANAGEMENT AND TREATMENT CHART FOR **SKIN** RELATED DIAGNOSES

**Severe soft tissue or muscles infection**

Give first dose of oral Cloxacillin (*see below*)

REFER TO HOSPITAL

**Soft tissue infection or folliculitis**

Give Cloxacillin, 25mg/kg, 4 times a day, for 5 days  
 Clean sores with antiseptic. Drain pus if fluctuance.

Advise caretaker to come back: After 1 day if symptoms persist  
 Immediately if the child is not able to drink, or becomes sicker.

| Cloxacillin 25mg/kg           | Syrup 125mg/5ml | Capsule 250 mg |
|-------------------------------|-----------------|----------------|
| 4 - <6 kg (2 to <4 months)    | 5ml             |                |
| 6 - <14 kg (4 mths to <3 yrs) | 10ml            | 1              |
| 14 - 19 kg (3 to <5 years)    | 15ml            | 2              |

**Impetigo or minor abscess**

Clean sores with antiseptic. Drain pus if fluctuance.

Advise caretaker to come back: Immediately if the child is not able to drink/breastfeed, becomes sicker, develops fever  
 After 2 days if symptoms persist

\* For local treatments: Explain to the caretaker what the treatment is and how it should be given. Tell her/him how often to do the treatment at home. If needed, give caretaker the tube of tetracycline ointment or a small bottle of gentian violet.

**USE OF A SPACER**

A spacer is a way of delivering the bronchodilator drugs effectively into the lungs. NO CHILD UNDER 5 YEARS OF AGE SHOULD RECEIVE AN INHALER WITHOUT A SPACER. A spacer works as well as a nebuliser if correctly used.

**Spacers can be made in the following way:**

Use a 500ml drink bottle or similar. Cut a hole in the bottle base in the same shape as the mouthpiece of the inhaler, with a sharp knife. Cut the bottle between the upper quarter and the lower 3/4 and disregard the upper quarter of the bottle.

Cut a small V in the border of the large open part of the bottle to fit to the child's nose and be used as a mask. Flame the edge of the cut bottle with a candle or a lighter to soften it. In a small baby, a mask can be made by making a similar hole in a plastic (not polystyrene) cup. Alternatively commercial spacers can be used if available.

**To use an inhaler with a spacer\*:**

Remove the inhaler cap. Shake the inhaler well. Insert mouthpiece of the inhaler through the hole in the bottle or plastic cup. The child should put the opening of the bottle into his mouth and breath in and out through the mouth. A carer then presses down the inhaler and sprays into the bottle while the child continues to breath normally. Wait for three to four breaths and repeat. For younger children place the cup over the child's mouth and use as a spacer in the same way.

\* If a spacer is being used for the first time, it should be primed by 4-5 extra puffs from the inhaler.

**WEIGHT FOR AGE**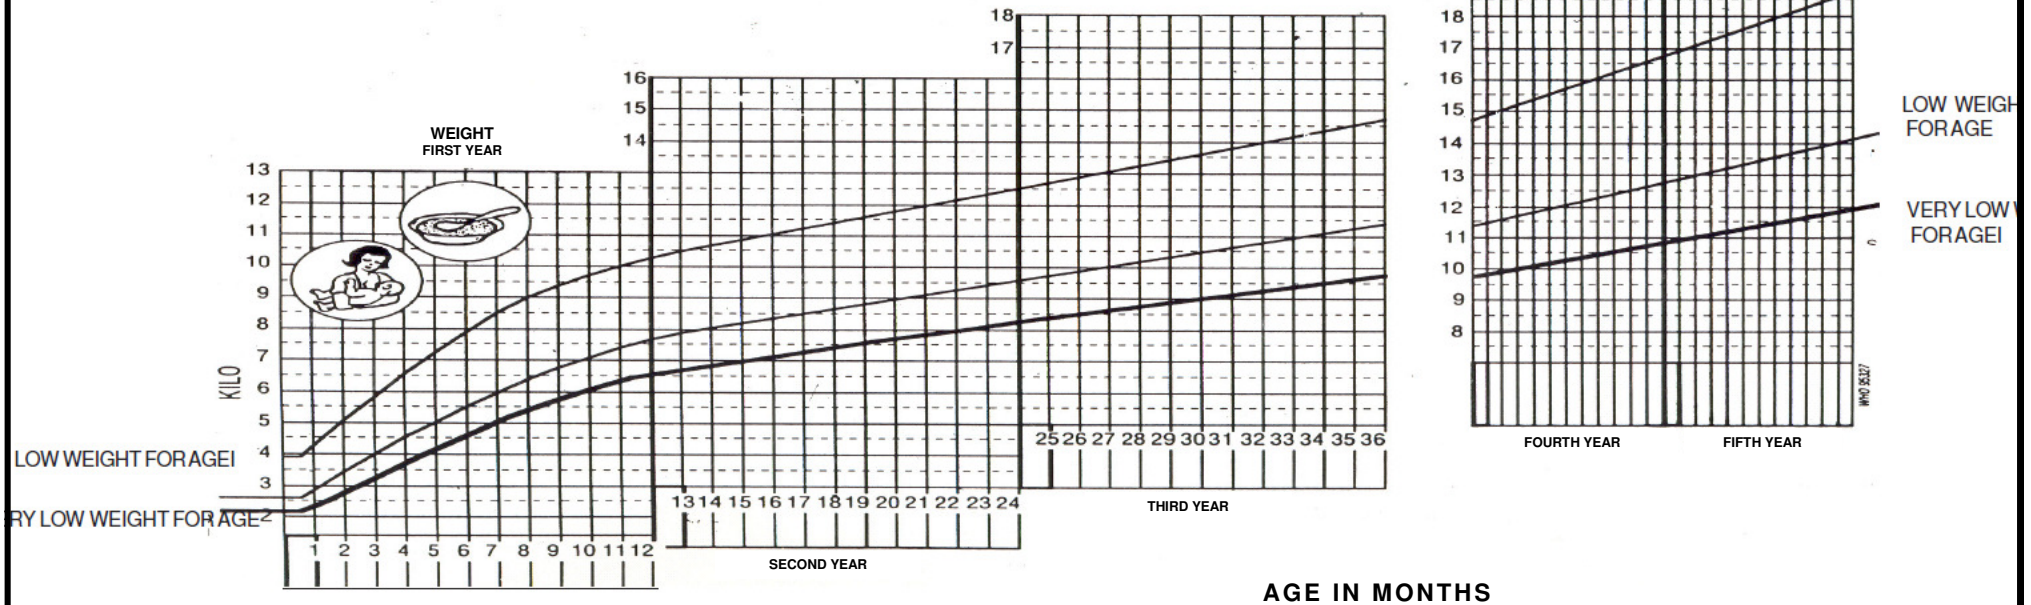

Supplement: pone.0127674.s001.pdf [file pone.0127674.s001.pdf]
